# Supplementary material for: Metabolomics Analysis Reveals Metabolites and Metabolic Pathways Involved in the Growth and Quality of Water Dropwort [Oenanthe javanica (Blume) DC.] under Nutrient Solution Culture
Source: MDPI journal article supplement (doi:10.3390/plants12071459), 2023-03-27
Supplement: s1 [file s1]

**Table S1** Macronutrient formulae applied on soilless cultivation of water dropwort (mg/L).

| Formula          | Nutrition contents                                   |                  |                                 |                                                 |                                                |                                      |                                 |                                | Salts in total |
|------------------|------------------------------------------------------|------------------|---------------------------------|-------------------------------------------------|------------------------------------------------|--------------------------------------|---------------------------------|--------------------------------|----------------|
|                  | Ca(NO <sub>3</sub> ) <sub>2</sub> ·4H <sub>2</sub> O | KNO <sub>3</sub> | NH <sub>4</sub> NO <sub>3</sub> | (NH <sub>4</sub> ) <sub>2</sub> SO <sub>4</sub> | NH <sub>4</sub> H <sub>2</sub> PO <sub>4</sub> | MgSO <sub>4</sub> ·7H <sub>2</sub> O | KH <sub>2</sub> PO <sub>4</sub> | K <sub>2</sub> SO <sub>4</sub> |                |
| Hoagland         | 945                                                  | 607              | –                               | –                                               | 115                                            | 493                                  | –                               | –                              | 2160           |
| Cooper           | 1062                                                 | 505              | –                               | –                                               | –                                              |                                      | 140                             | –                              | 2445           |
| Dutch greenhouse | 886                                                  | 303              | –                               | 33                                              | –                                              |                                      | 204                             | 218                            | 1891           |
| Garden-style     | 945                                                  | 809              | –                               | –                                               | 153                                            | 493                                  | –                               | –                              | 2400           |
| Yamasaki         | 826                                                  | 607              | –                               | –                                               | 115                                            | 483                                  | –                               | –                              | 1382           |
| SCAU             | 472                                                  | 404              | 53                              | –                                               | –                                              | 246                                  | 100                             | 116                            | 1272           |

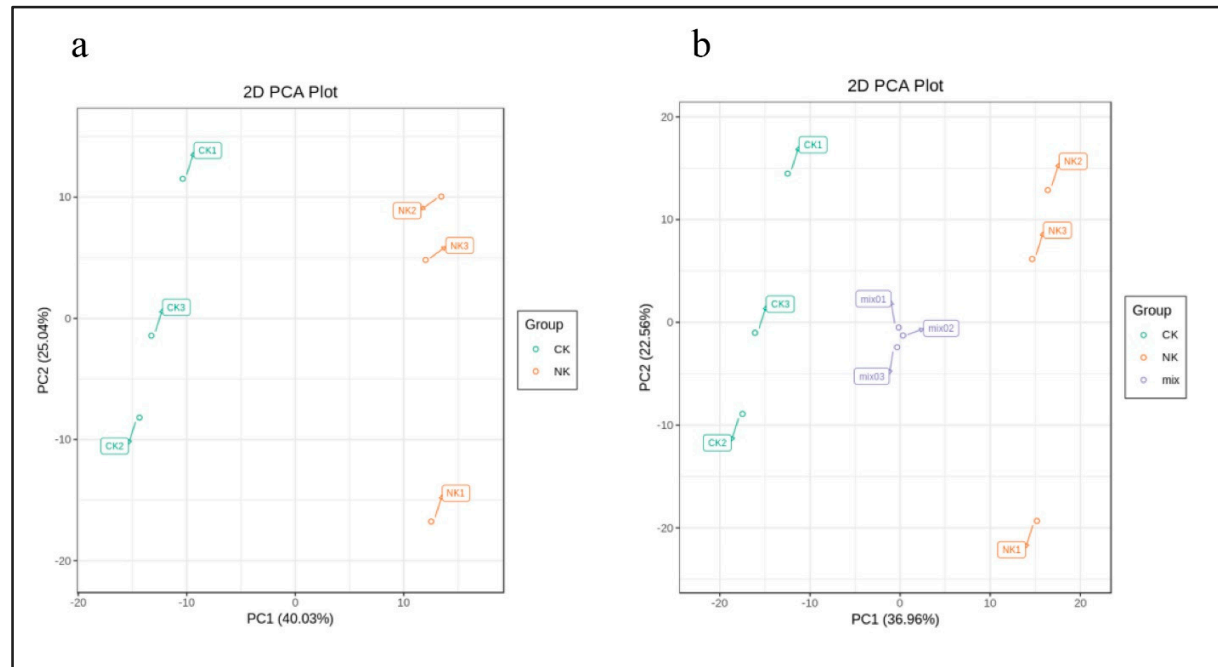

**Figure S1. Sample quality evaluation of water dropwort with soil culture (CK) and Yamasaki nutrient solution (NK). (a) PCA score chart of test sample; (b) PCA score chart of test sample and quality control sample.**

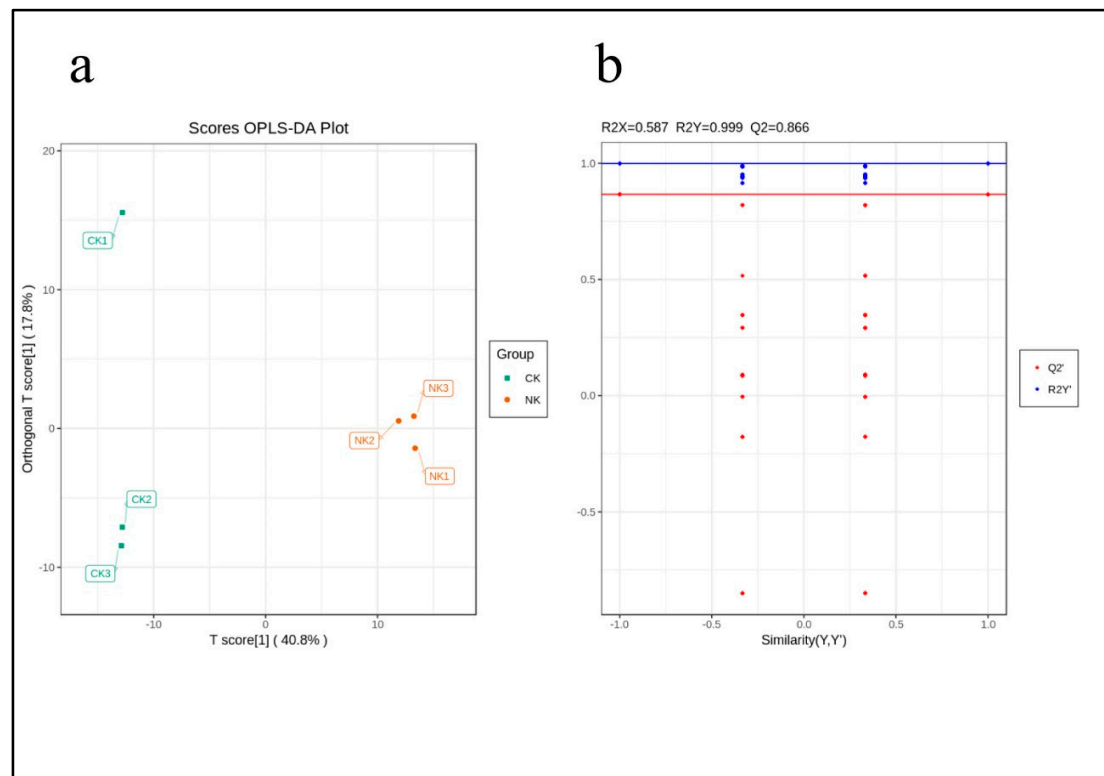

**Figure S2. Differential metabolite analysis on the basis of orthogonal signal correction and partial least squares-discriminant analysis (OPLS-DA). (a) The score chart. (b) verification chart.**

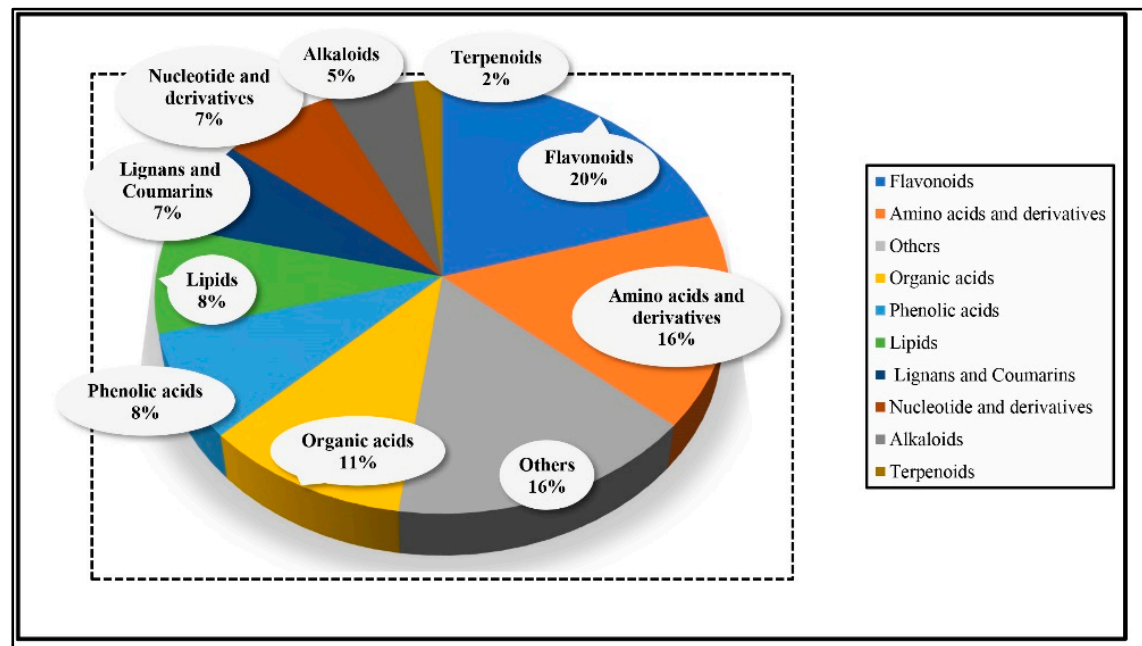

**Figure S3. Primary classification of different metabolites of water dropwort cultivated in nutrient solution.**

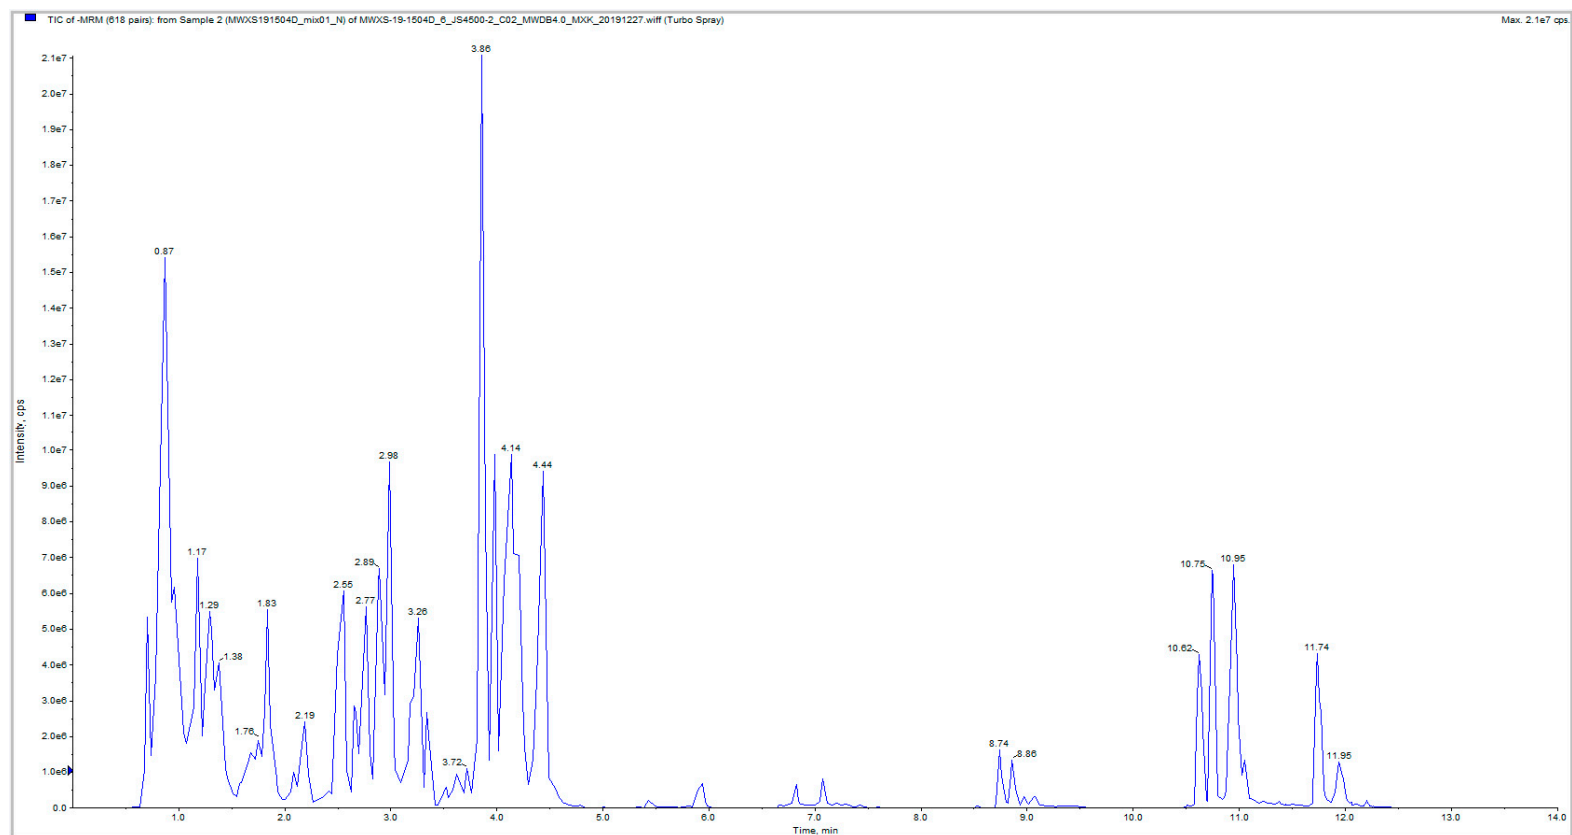

**Figure S4. QC sample mass spectrometry detection TIC current diagram.**
